# Supplementary material for: Extracellular Vesicles and Their Renin–Angiotensin Cargo as a Link between Metabolic Syndrome and Parkinson’s Disease
Source: MDPI journal article supplement (doi:10.3390/antiox12122045), 2023-11-26
Supplement: s1 [file s1]

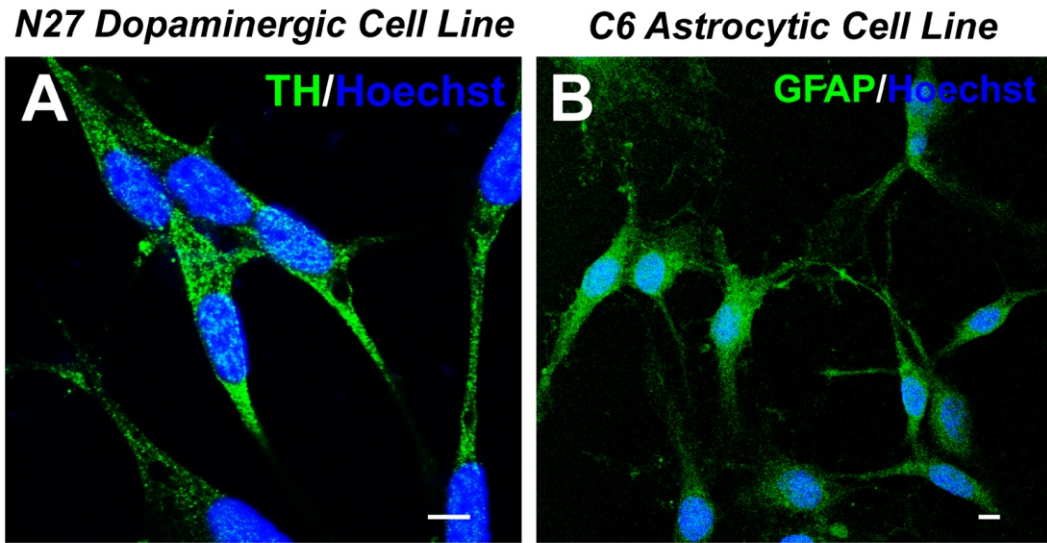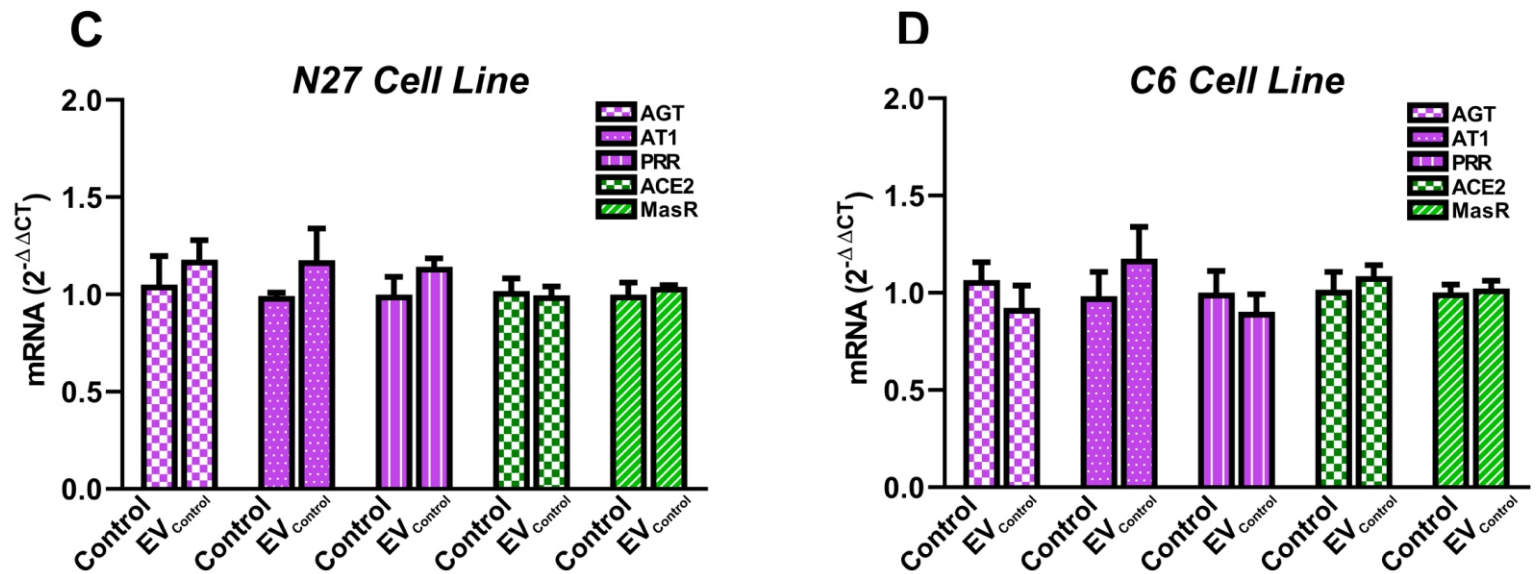

**Figure S1.** Additional control experiments. Photomicrographs of representative dopaminergic cell line N27 (**A**; TH-positive, green) and C6 astrocytic cell line (**B**; GFAP-positive, green) show that the cell lines express the phenotype of dopaminergic neurons and astrocytes. Nuclei are labeled in blue with Hoechst. Labelling was carried out as previously described [20]. Scale bar: 5  $\mu$ m. Effects of treatment with EV<sub>Control</sub> in N27 dopaminergic cell line (**C**) and C6 astrocytic cell line (**D**). No changes were observed after treatment with EV<sub>Control</sub> relative to Control (i.e. cultures treated with EV vehicle, PBS). Data are given as mean  $\pm$  SEM. All comparisons were carried out using the Student t-test, except for AT1 in the N27 cell line, where the Mann-Whitney Rank Sum Test was used ( $n=3-4$ /group). ACE2: angiotensin-converting enzyme 2; AGT: angiotensinogen; AT1: angiotensin type 1 receptor; EV<sub>Control</sub>: EVs isolated from the serum of control animals; MasR: Mas-related receptor; PRR: (pro)-renin receptor.

**Table S1.** Results of Statistical Analysis

| Figure | Groups                                                                                                                | Statistical test                                     | Statistics                   | p value |
|--------|-----------------------------------------------------------------------------------------------------------------------|------------------------------------------------------|------------------------------|---------|
| 1C     | Control vs MetS vs MetS+CAND                                                                                          | Kruskal-Wallis One Way Analysis of Variance on Ranks | H(2)= 11.942                 | 0.003   |
| 1D     | Control vs MetS vs MetS+CAND                                                                                          | One Way Analysis of Variance                         | F <sub>(2,15)</sub> = 18.955 | <0.001  |
| 2A     | Control vs MetS vs MetS+CAND                                                                                          | Kruskal-Wallis One Way Analysis of Variance on Ranks | H(2)= 12,784                 | 0,002   |
| 2B     | Control vs MetS vs MetS+CAND                                                                                          | One Way Analysis of Variance                         | F <sub>(2,14)</sub> = 28,116 | <0,001  |
| 2C     | Control vs MetS vs MetS+CAND                                                                                          | One Way Analysis of Variance                         | F <sub>(2,14)</sub> = 11,980 | <0.001  |
| 2D     | Control vs MetS vs MetS+CAND                                                                                          | One Way Analysis of Variance                         | F <sub>(2,15)</sub> = 0,924  | 0.418   |
| 2E     | Control vs MetS vs MetS+CAND                                                                                          | One Way Analysis of Variance                         | F <sub>(2,13)</sub> = 4,721  | 0,029   |
| 3A     | Control vs MetS vs MetS+CAND                                                                                          | Kruskal-Wallis One Way Analysis of Variance on Ranks | H(2)= 11.789                 | 0.003   |
| 3B     | Control vs MetS vs MetS+CAND                                                                                          | One Way Analysis of Variance                         | F <sub>(2,15)</sub> = 2.369  | 0.128   |
| 3C     | Control vs MetS vs MetS+CAND                                                                                          | One Way Analysis of Variance                         | F <sub>(2,15)</sub> = 24,197 | <0,001  |
| 3D     | Control vs MetS vs MetS+CAND                                                                                          | One Way Analysis of Variance                         | F <sub>(2,15)</sub> = 9,608  | 0.002   |
| 3E     | Control vs MetS vs MetS+CAND                                                                                          | Kruskal-Wallis One Way Analysis of Variance on Ranks | H(2)= 12.538                 | 0.002   |
| 3F     | Control vs MetS vs MetS+CAND                                                                                          | Kruskal-Wallis One Way Analysis of Variance on Ranks | H(2)= 13,053                 | 0.001   |
| 3G     | Control vs MetS vs MetS+CAND                                                                                          | One Way Analysis of Variance                         | F <sub>(2,15)</sub> = 24,197 | <0,001  |
| 3H     | Control vs MetS vs MetS+CAND                                                                                          | One Way Analysis of Variance                         | F <sub>(2,15)</sub> = 52,772 | <0,001  |
| 4A     | Control vs MetS vs MetS+CAND                                                                                          | Kruskal-Wallis One Way Analysis of Variance on Ranks | H(2)= 8,180                  | 0.017   |
| 4B     | Control vs MetS vs MetS+CAND                                                                                          | One Way Analysis of Variance                         | F <sub>(2,12)</sub> = 62,291 | <0.001  |
| 4C     | Control vs MetS vs MetS+CAND                                                                                          | One Way Analysis of Variance                         | F <sub>(2,15)</sub> = 15.048 | <0.001  |
| 4D     | Control vs MetS vs MetS+CAND                                                                                          | Kruskal-Wallis One Way Analysis of Variance on Ranks | H(2)= 11.380                 | 0.003   |
| 5I     | EV <sub>Control</sub> vs EV <sub>MetS</sub> vs 6-OHDA vs 6OHDA+ EV <sub>MetS</sub> vs 6OHDA+ EV <sub>MetS</sub> +CAND | One Way Analysis of Variance                         | F <sub>(4,25)</sub> = 32.781 | <0.001  |
| 5J     | Control vs EV <sub>Control</sub> vs CAND                                                                              | Kruskal-Wallis One Way Analysis of Variance on Ranks | H(2)= 0.363                  | 0.834   |
| 6A     | Control vs EV <sub>MetS</sub> vs EV <sub>MetS</sub> +CAND                                                             | One Way Analysis of Variance                         | F <sub>(2,15)</sub> = 12.651 | <0.001  |
| 6B     | Control vs EV <sub>MetS</sub> vs EV <sub>MetS</sub> +CAND                                                             | One Way Analysis of Variance                         | F <sub>(2,15)</sub> = 90.922 | <0.001  |
| 6C     | Control vs EV <sub>Control</sub> vs EV <sub>MetS</sub> vs EV <sub>MetS</sub> +CAND                                    | One Way Analysis of Variance                         | F <sub>(3,20)</sub> = 59.941 | <0.001  |
| 6D     | Control vs EV <sub>Control</sub> vs EV <sub>MetS</sub> vs EV <sub>MetS</sub> +CAND                                    | Kruskal-Wallis One Way Analysis of Variance on Ranks | H(3)= 15.754                 | 0.001   |
| 6E     | Control vs EV <sub>Control</sub> vs EV <sub>MetS</sub> vs EV <sub>MetS</sub> +CAND                                    | Kruskal-Wallis One Way Analysis of Variance on Ranks | H(3)= 9.025                  | 0.029   |
| 7A     | Control vs EV <sub>MetS</sub> vs EV <sub>MetS</sub> +CAND                                                             | One Way Analysis of Variance                         | F <sub>(2,15)</sub> = 6.470  | 0.009   |
| 7B     | Control vs EV <sub>MetS</sub> vs EV <sub>MetS</sub> +CAND                                                             | One Way Analysis of Variance                         | F <sub>(2,15)</sub> = 5.584  | 0.015   |
| 7C     | Control vs EV <sub>Control</sub> vs EV <sub>MetS</sub> vs EV <sub>MetS</sub> +CAND                                    | Kruskal-Wallis One Way Analysis of Variance on Ranks | H(3)= 14.820                 | 0.002   |
| 7D     | Control vs EV <sub>MetS</sub> vs EV <sub>MetS</sub> +CAND                                                             | One Way Analysis of Variance                         | F <sub>(2,15)</sub> = 18.527 | <0.001  |

**Table S1.** Results of Statistical Analysis

|           |                                                                                                         |                                                      |                              |        |
|-----------|---------------------------------------------------------------------------------------------------------|------------------------------------------------------|------------------------------|--------|
| <b>7E</b> | Control <i>vs</i> EV <sub>MetS</sub> <i>vs</i> EV <sub>MetS</sub> +CAND                                 | One Way Analysis of Variance                         | F <sub>(2,15)</sub> = 8.013  | 0.004  |
| <b>7F</b> | Control <i>vs</i> EV <sub>Control</sub> <i>vs</i> EV <sub>MetS</sub> <i>vs</i> EV <sub>MetS</sub> +CAND | One Way Analysis of Variance                         | F <sub>(3,20)</sub> = 3.999  | 0.022  |
| <b>8A</b> | Control <i>vs</i> EV <sub>MetS</sub> <i>vs</i> EV <sub>MetS</sub> +CAND                                 | One Way Analysis of Variance                         | F <sub>(2,15)</sub> = 10.692 | 0.001  |
| <b>8B</b> | Control <i>vs</i> EV <sub>MetS</sub> <i>vs</i> EV <sub>MetS</sub> +CAND                                 | One Way Analysis of Variance                         | F <sub>(2,15)</sub> = 5.323  | 0.018  |
| <b>8C</b> | Control <i>vs</i> EV <sub>MetS</sub> <i>vs</i> EV <sub>MetS</sub> +CAND                                 | One Way Analysis of Variance                         | F <sub>(2,15)</sub> = 27.324 | 0.001  |
| <b>8D</b> | Control <i>vs</i> EV <sub>MetS</sub> <i>vs</i> EV <sub>MetS</sub> +CAND                                 | One Way Analysis of Variance                         | F <sub>(2,15)</sub> = 3.982  | 0.041  |
| <b>8E</b> | Control <i>vs</i> EV <sub>MetS</sub> <i>vs</i> EV <sub>MetS</sub> +CAND                                 | Kruskal-Wallis One Way Analysis of Variance on Ranks | H(2)= 8.082                  | 0.018  |
| <b>8F</b> | Control <i>vs</i> EV <sub>MetS</sub> <i>vs</i> EV <sub>MetS</sub> +CAND                                 | One Way Analysis of Variance                         | F <sub>(2,15)</sub> = 9.911  | 0.002  |
| <b>8G</b> | Control <i>vs</i> EV <sub>MetS</sub> <i>vs</i> EV <sub>MetS</sub> +CAND                                 | Kruskal-Wallis One Way Analysis of Variance on Ranks | H(2)= 9.739                  | 0.008  |
| <b>8H</b> | Control <i>vs</i> EV <sub>MetS</sub> <i>vs</i> EV <sub>MetS</sub> +CAND                                 | One Way Analysis of Variance                         | F <sub>(2,15)</sub> = 5.180  | 0.019  |
| <b>8I</b> | Control <i>vs</i> EV <sub>MetS</sub> <i>vs</i> EV <sub>MetS</sub> +CAND                                 | One Way Analysis of Variance                         | F <sub>(2,16)</sub> = 36.022 | <0.001 |
| <b>8J</b> | Control <i>vs</i> EV <sub>MetS</sub> <i>vs</i> EV <sub>MetS</sub> +CAND                                 | One Way Analysis of Variance                         | F <sub>(2,15)</sub> = 13.221 | <0.001 |
